# Supplementary material for: Coordination of WNT signaling and ciliogenesis during odontogenesis by piezo type mechanosensitive ion channel component 1
Source: PubMed Central journal article supplement (PMC6791893; doi:10.1038/s41598-019-51381-9), 2019-10-14
Supplement: 41598_2019_51381_MOESM1_ESM.pdf [file 41598_2019_51381_MOESM1_ESM.pdf]

**Coordination of WNT signaling and ciliogenesis during odontogenesis  
by piezo type mechanosensitive ion channel component 1**

Aya Miyazaki<sup>1</sup>, Asuna Sugimoto<sup>1</sup>, Keigo Yoshizaki<sup>2</sup>, Keita  
Kawarabayashi<sup>1</sup>, Kokoro Iwata<sup>1</sup>, Rika Kurogoushi<sup>1</sup>, Takamasa Kitamura<sup>1</sup>,  
Kunihiro Ohtsuka<sup>3</sup>, Tomokazu Hasegawa<sup>1</sup>, Yuki Akazawa<sup>1</sup>, Satoshi  
Fukumoto<sup>4</sup>, Naozumi Ishimaru<sup>3</sup>, Tsutomu Iwamoto<sup>1,\*</sup>

# Supplementary Table S1

## Used primers for PCR

| Human primers |         | Sequence                        | Product size |
|---------------|---------|---------------------------------|--------------|
| <i>PANX3</i>  | forward | 5'-TGAAGATCCGGCAGAAGAGT-3'      | 74           |
|               | reverse | 5'-GTATCGTTCTTTCCGAGCC-3'       |              |
| <i>DSPP</i>   | forward | 5'-AGAGGACACCCAGAAGCTCA-3'      | 271          |
|               | reverse | 5'-TTCTGATTTTTGGCCAGGTC-3'      |              |
| <i>PIEZO1</i> | forward | 5'-CAGGCCTATGAGGAGCTGTC-3'      | 170          |
|               | reverse | 5'-TGTAGAGCTCCCGTTCAT-3'        |              |
| <i>PIEZO2</i> | forward | 5'-GCCCAACAAAGCCAGTTGAA-3'      | 167          |
|               | reverse | 5'-GGGCTGATGGTCCACAAAGA-3'      |              |
| <i>TRPV4</i>  | forward | 5'-GACGGGGACCTATAGCATCA-3'      | 228          |
|               | reverse | 5'-AACAGGTCCAGGAGGAAGGT-3'      |              |
| <i>ASIC3</i>  | forward | 5'-ATGGCGCAACTCTATGCCCGT-3'     | 202          |
|               | reverse | 5'-TGATGTCCAGCCATTGCCCA-3'      |              |
| <i>WNT1</i>   | forward | 5'-ATGGGGCTCTGGGCGCTGTTGC-3'    | 252          |
|               | reverse | 5'-CCCACTCACGCTGTGCAGGATC-3'    |              |
| <i>WNT2</i>   | forward | 5'-ATGACCAAGTGTGGGTGTAAGTTC-3'  | 159          |
|               | reverse | 5'-TGTAGAAGGAAGGTGGATGGT-3'     |              |
| <i>WNT3</i>   | forward | 5'-TGCCAGGAGTGTATTCGCATC-3'     | 110          |
|               | reverse | 5'-TTCCCATGAGACTTCGCTGA-3'      |              |
| <i>WNT3a</i>  | forward | 5'-AACCGCCACAACAACGAGGCT-3'     | 306          |
|               | reverse | 5'-AGGGTTGGGCTCGCAGAAGTT-3'     |              |
| <i>WNT5a</i>  | forward | 5'-TTACCACTGCAACTATTGCACCTC-3'  | 146          |
|               | reverse | 5'-CACAATGAACCTTAGTTTCCAACC-3'  |              |
| <i>WNT5b</i>  | forward | 5'-TTCTGACAGACGCCAACTCC-3'      | 154          |
|               | reverse | 5'-GCCATGTGCTCCTGGTACAAT-3'     |              |
| <i>WNT6</i>   | forward | 5'-GACGAGAAGTCGAGGCTCTT-3'      | 88           |
|               | reverse | 5'-CCTCGTTGTTGTGCAGTTG-3'       |              |
| <i>WNT7a</i>  | forward | 5'-GCCTGGACGAGTGCAGTTTCA-3'     | 276          |
|               | reverse | 5'-CGATGCCGTAGCGGATGTC-3'       |              |
| <i>WNT7b</i>  | forward | 5'-CACAGAACTTTCGCAAGTGGA-3'     | 127          |
|               | reverse | 5'-GGCCAGGAATCTTGTTCAG-3'       |              |
| <i>WNT8a</i>  | forward | 5'-TATGCTCTGGGCAGCTCTGG-3'      | 257          |
|               | reverse | 5'-CAAGCAAAGTGAAGTTCAGTTC-3'    |              |
| <i>WNT8b</i>  | forward | 5'-TGGTCCAAAGGCTTACCTGATT-3'    | 92           |
|               | reverse | 5'-GGTCCCAGGCAAAGTGCATCTT-3'    |              |
| <i>WNT9b</i>  | forward | 5'-ATGGAGCGCTGCACCTGTGAT-3'     | 190          |
|               | reverse | 5'-TCACAGCCTTGATGCCACGT-3'      |              |
| <i>WNT10b</i> | forward | 5'-CATGCATGGACTTTGGAGAG-3'      | 156          |
|               | reverse | 5'-TGTGCCATGACACTTGCATT-3'      |              |
| <i>WNT11</i>  | forward | 5'-AAACAGGATCCCAAGCCAATAAACT-3' | 122          |
|               | reverse | 5'-GATGGAGCAGGAGCCAGACA-3'      |              |
| <i>WNT16</i>  | forward | 5'-AAGTGAAGGCTGGCACTGG-3'       | 188          |
|               | reverse | 5'-GGCAGTCTACTGACATCAACTTGG-3'  |              |
| <i>DACT3</i>  | forward | 5'-AACCTTCTGTGGGACAGTG-3'       | 178          |
|               | reverse | 5'-GTAGGGCGCTGAGAAGGAC-3'       |              |
| <i>GAPDH</i>  | forward | 5'-GCACCGTCAAGGCTGAGAAC-3'      | 138          |
|               | reverse | 5'-TGGTGAAGACGCCAGTGGA-3'       |              |
